# Supplementary material
Source: publisher site journal article supplement (https://www.dovepress.com/article/225543)
Supplement: Supplementary file 1 [file get_supplementary_file.php]

**Appendix**

**Quality control criteria for forced oscillation technique (FOT) measurements**

Respiratory system impedance was measured with an in-house developed FOT device (Woolcock Institute of Medical Research, Sydney, Australia)1 in accordance with generic technical and design specifications for FOT machines.2 Oscillations of 5, 11 and 19 Hz frequency were generated by a loudspeaker with peak-to-peak oscillation <2.5 cmH2O. Subjects were breathing through a resistive exhaust port for oscillations to enter the airway opening (mouth) where flow and pressure were measured by a screen pneumotachograph and solid-state pressure transducers. Signals were sampled at 355 Hz and low-pass filtered centred at 25 Hz for noise removal. The breathing signal was extracted using a high-pass filter centred at 2 Hz. The 5-Hz oscillation signal was extracted during post-acquisition data analysis using a ±3 Hz band-pass filter centred around 5 Hz. Any values with a coherence value <0.9 were automatically excluded. The FOT device underwent a resistance check prior to each subject testing session with a resistance tube of known impedance value, and if the measured resistance values deviated by >5% of the known resistance, the device underwent recalibration. Prior to the subject going on the mouthpiece, the pneumotachograph was furthermore calibrated to zero-flow. Subjects were monitored for signs of leak, cough, glottis closure or unusually large breaths by the tester observing the subject and by examination of the volume-time traces. If these artefacts were detected at the time, the acquisition was repeated. In post-processing, a minimum of 5 tidal breaths that were artefact free were required as part of the quality control criteria. If an artefact was identified, the entire breath was removed using custom in-house software (FOT Solver software version 2.0.0.498, DAQ version 3.4).3

Following data acquisition, quality control of FOT measurements was performed using an automated computer algorithm based on complete breath analysis as previously described;3 with complete breaths accepted if (1) no negative resistance points present, (2) no leak detected as indicated by spikes in admittance versus time, (3) tidal volume within 1.5 standard deviations (SD) of mean value for all breaths, (4) expiratory flow volume curve within 1.5 SD of mean as defined by sum of squared distances from median flow value for all breaths at each volume point and (5) no glottic closures detected by resistance-flow loop deviation within 1.5 SD of mean as defined by sum of squared distances from median resistance value for all breaths at each flow point. A minimum of 5 acceptable breaths was used to determine average FOT parameters for each recording.

**Table A1.** Univariate relationships between FOT indices and measures of hyperinflation at baseline

|  | IC | | IC/TLC# | |
| --- | --- | --- | --- | --- |
| Rs | P | Rs | P |
| Rmean | **-0.67** | **0.006** | **-0.71** | **0.004** |
| Rinsp | **-0.63** | **0.01** | **-0.74** | **0.002** |
| Xmean | **0.63** | **0.01** | **0.73** | **0.003** |
| Xinsp | **0.81** | **<0.001** | **0.70** | **0.005** |
| DeltaXrs | -0.50 | 0.06 | **-0.62** | **0.02** |

#n = 14 (1 subject unable to perform plethysmographic lung volumes)

IC = inspiratory capacity; IC/TLC = inspiratory capacity corrected by total lung capacity; Rs = Spearman’s correlation coefficient; P = p value; Rmean = mean resistance; Rinsp = inspiratory resistance; Xmean = mean reactance; Xinsp = inspiratory reactance; DeltaXrs = index of expiratory flow limitation as per Dellacà et al.4

**References**

1. Thorpe CW, Salome CM, Berend N, King GG. Modeling airway resistance dynamics after tidal and deep inspirations. J Appl Physiol. 2004;97(5):1643–1653. doi:10.1152/japplphysiol.01300.2003

2. Oostveen E, MacLeod D, Lorino H, et al. The forced oscillation technique in clinical practice: methodology, recommendations and future developments. Eur Respir J. 2003;22(6):1026–1041. doi:10.1183/09031936.03.00089403

3. Robinson PD, Turner M, Brown NJ, et al. Procedures to improve the repeatability of forced oscillation measurements in school-aged children. Respir Physiol Neurobiol. 2011;177(2):199–206. doi:10.1016/j.resp.2011.02.004

4. Dellacà RL, Santus P, Aliverti A, et al. Detection of expiratory flow limitation in COPD using the forced oscillation technique. *Eur Respir J.* 2004;23(2):232-40. doi:10.1183/09031936.04.00046804
